# Supplementary material for: Construction of a turn-on probe for fast detection of H2S in living cells based on a novel H2S trap group with an electron rich dye
Source: Royal Society of Chemistry journal article supplement (doi:10.1039/c5ra21041k), 2015-01-01

## Supporting Information

### **Construction of a turn-on probe for fast detection of H<sub>2</sub>S in living cells based on a novel H<sub>2</sub>S trap group with an electron rich dye**

Qian Yang, Fuxu Zhan,\* Qiufen Wang, Zhiyuan Zhuang, Guangyou Zhang, Gengxiu Zheng\*

School of Chemistry and Chemical Engineering, University of Jinan, Jinan 250022,

China

Tel: +86-53182765841; E-mail: chm\_zhanfx@ujn.edu.cn (F. X. Zhan),

chm\_zhenggx@ujn.edu.cn (G. X. Zheng).

## 1. General information

All reagents and solvents were purchased from commercial suppliers and used without further purification unless otherwise stated. Deionized water was used throughout all experiments. All reactions were magnetically stirred and monitored by thin layer chromatography (TLC). Column chromatography was performed using 200-300 mesh silica gel supplied by Qingdao Marine Chemical Factor. The  $^1\text{H}$  NMR and  $^{13}\text{C}$  NMR spectra were recorded on a Bruker AVANCE AV400 at 400 and 100 MHz, respectively. All NMR chemical shifts were referenced to residual solvent peaks or to  $\text{Si}(\text{CH}_3)_4$  as an internal standard, spectra recorded in  $\text{CDCl}_3$  were referenced to residual  $\text{CHCl}_3$  at 7.26 ppm for  $^1\text{H}$  or 77.0 ppm for  $^{13}\text{C}$ . All coupling constants  $J$  are quoted in Hz. FTIR spectra were obtained with a Bruker Vertex 70 FT-IR spectrometer with KBr pellets. All IR samples were prepared as thin film and reported in wave numbers ( $\text{cm}^{-1}$ ). High resolution mass spectra were obtained on a Q-TOF6510 instrument mass spectrometer. Fluorescence spectra were carried out on an Edinburgh Instruments Ltd-FLS920 fluorescence spectrophotometer.

## 2. Synthesis and Characterization of Compounds

Synthesis of **S5**

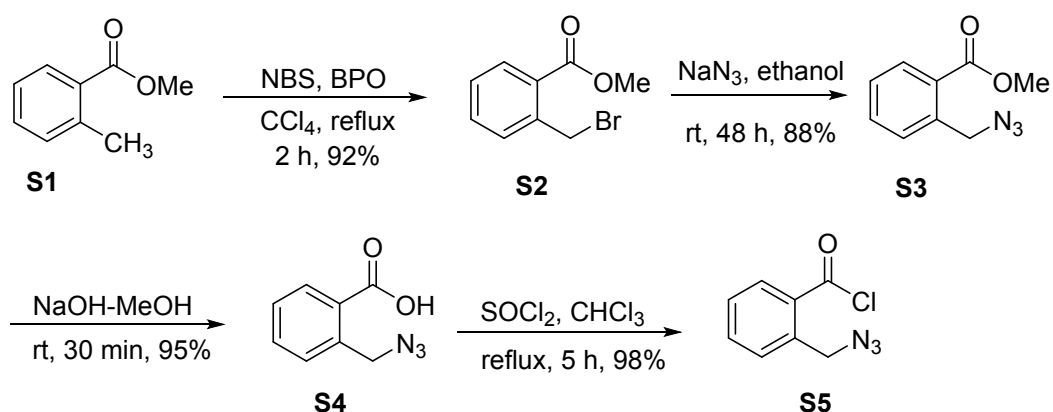

To a solution of **S1** (10.0 g, 66.5 mmol) in  $\text{CCl}_4$ , was added NBS (13.0 g, 73.2 mmol) and BPO (129 mg, 0.5 mmol). The resulting solution was heated to reflux for 2 h. The solution was cooled to room temperature, and then filtered and concentrated. The crude product **S2** was got as colorless oil (14.0 g, 92%), which was used for the next step without further purification.

To a solution of **S2** (14.0 g, 61.2 mmol) in absolute ethanol, was added  $\text{NaN}_3$  (6.5 g, 99.8 mmol). The resulting solution was warmed to room temperature and stirred for 48 h. The mixture was quenched by addition of brine and extracted with ethyl acetate (3×10 mL). The organic layer was separated, dried over anhydrous  $\text{MgSO}_4$ , filtered, and concentrated to yield 10.3 g (88%) of **S3** as light yellow oil, which was used for the next step without further purification.

To a solution of aq NaOH–MeOH (aq NaOH, 2 M, 1:1, v:v), was added **S3** (10.2 g, 53.8 mmol). The resulting solution was stirred for 30 min. Then the mixture was extracted with DCM (3×10 mL). The aqueous layer was acidified to pH = 3 and then extracted with DCM (3×10 mL). The combined organic layers were dried over anhydrous  $\text{MgSO}_4$ , filtered, and concentrated to yield 9 g (95%) of **S4** as a white solid. Data for **S4**:  $R_f$  0.35 (petroleum ether:ethyl acetate = 1:1);  $^1\text{H NMR}$  (400 MHz,  $\text{CDCl}_3$ )  $\delta$  8.18 (dd,  $J = 7.8, 1.3, 1\text{H}$ ), 7.63 (td,  $J = 7.6, 1.4, 1\text{H}$ ), 7.58–7.52 (m, 1H), 7.46 (td,  $J = 7.7, 1.3, 1\text{H}$ ), 4.89 (s, 2H); Anal. Calcd for  $\text{C}_8\text{H}_7\text{N}_3\text{O}_2$ : C, 54.23; H, 3.98; N, 23.72. Found: C, 54.43; H, 4.10; N, 23.60; mp 65 °C. The  $^1\text{H}$  spectra matched those reported by Zhen Xi.<sup>1</sup>

To a solution of **S4** (354 mg, 2.0 mmol) in DCM, was added  $\text{SOCl}_2$  (0.43 mL, 6.0 mmol) at room temperature. The resulting solution was heated to reflux for 5 h. The mixture was cooled to room temperature and concentrated to yield 384 mg (98%) of **S5** as light yellow oil, which was used for the next step without further purification.

### Synthesis of **S8**

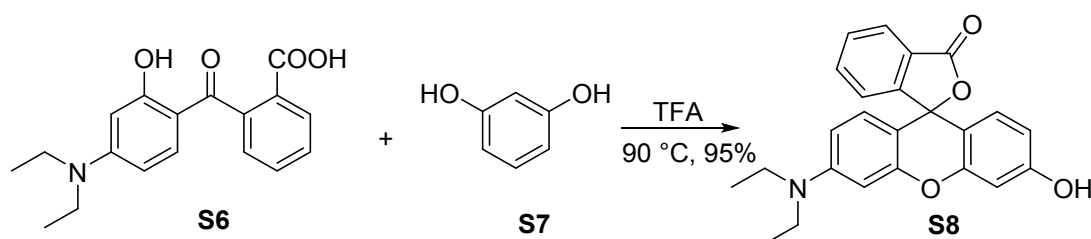

To a suspension of **S6** (6.0 g, 19.1 mmol) and resorcinol **S7** (2.1 g, 19.1 mmol) in TFA (20 mL) in a sealing tube, was added molecular sieve (2.0 g). The resulting mixture was heated to 90 °C and stirred for 6 h. Then the mixture was cooled to room temperature and concentrated to yield a crude product, which was recrystallized in

ethyl 1:1 petroleum ether:ethyl acetate affording **S8** as a red solid (7.0 g, 95% yield). Data for **S8**:  $R_f$  0.35 (petroleum ether:ethyl acetate = 1:1);  $^1\text{H}$  NMR (400 MHz,  $\text{DMSO-}d_6$ )  $\delta$  7.96 (d,  $J = 7.6$ , 1H), 7.80 (dt,  $J = 27.8$ , 7.5, 1H), 7.64 (dt,  $J = 30.2$ , 7.5, 2H), 7.38 (d,  $J = 7.4$ , 2H), 6.79 (d,  $J = 9.1$ , 2H), 6.18 (d,  $J = 9.2$ , 1H), 6.07 (d,  $J = 2.4$ , 1H), 3.38 (q,  $J = 6.9$ , 4H), 1.09 (t,  $J = 7.0$ , 6H); Anal. Calcd for  $\text{C}_{24}\text{H}_{21}\text{NO}_4$ : C, 74.40; H, 5.46; N, 3.62. Found: C, 74.31; H, 5.30; N, 3.55; mp 184.5-185.5 °C. The  $^1\text{H}$  spectra matched those reported by Xiao-Feng Yang.<sup>2</sup>

### Synthesis of molecule **AR**

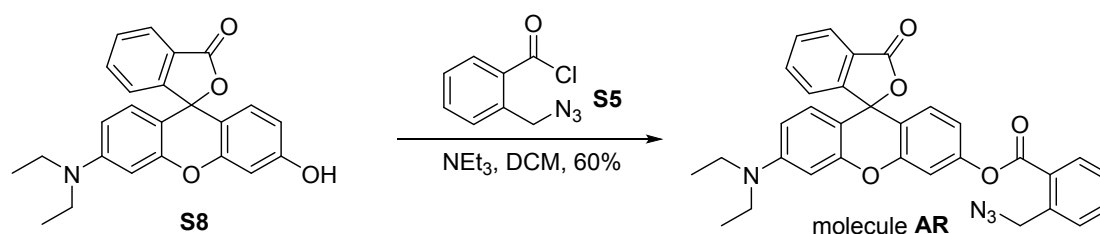

To a suspension of **S8** (379 mg, 1.9 mmol) and DMAP (315 mg, 2.6 mmol) in  $\text{DCM}$  (5 mL) at 0 °C, was added **S5** (500 mg, 1.3 mmol). The resulting mixture was warmed to room temperature and stirred overnight. The resulting mixture was extracted with  $\text{DCM}$  (3×20 mL). Combined organic layers were washed with brine, dried over anhydrous  $\text{MgSO}_4$  and concentrated to afford a red oil. Flash chromatography of the crude product (4:1 petroleum ether:ethyl acetate) provided the desired product as colorless oil (423 mg, 60%). Data for **AR**:  $R_f$  0.35 (petroleum ether:ethyl acetate = 4:1);  $^1\text{H}$  NMR (400 MHz,  $\text{CDCl}_3$ )  $\delta$  8.26 (dd,  $J = 7.8$ , 1.0, 1H), 8.03 (d,  $J = 7.5$ , 1H), 7.77–7.61 (m, 2H), 7.63–7.54 (m, 2H), 7.54–7.44 (m, 1H), 7.23 (d,  $J = 7.5$ , 1H), 7.17 (d,  $J = 2.1$ , 1H), 6.95–6.78 (m, 2H), 6.59 (d,  $J = 8.9$ , 1H), 6.46 (d,  $J = 2.5$ , 1H), 6.38 (dd,  $J = 8.9$ , 2.6, 1H), 4.87 (s, 2H), 3.37 (q,  $J = 7.0$ , 4H), 1.18 (t,  $J = 7.0$ , 6H);  $^{13}\text{C}$  NMR (100 MHz,  $\text{CDCl}_3$ )  $\delta$  169.56, 164.67, 153.02, 152.74, 152.48, 151.70, 149.69, 138.42, 134.92, 133.74, 131.78, 130.00, 129.65, 129.27, 128.88, 128.39, 127.44, 127.06, 124.95, 124.19, 117.52, 117.00, 110.42, 104.78, 97.58, 83.63, 53.12, 44.51, 12.51; IR (thin film)  $\nu_{\text{max}}$  3450, 2976, 2928, 2103, 1733, 11419, 1105, 755; HRMS-ESI ( $m/z$ )  $[\text{M} + \text{H}]^+$  calcd for  $\text{C}_{32}\text{H}_{27}\text{N}_4\text{O}_5^+$ , 547.1976, found: 547.1968.

## Synthesis of **5**

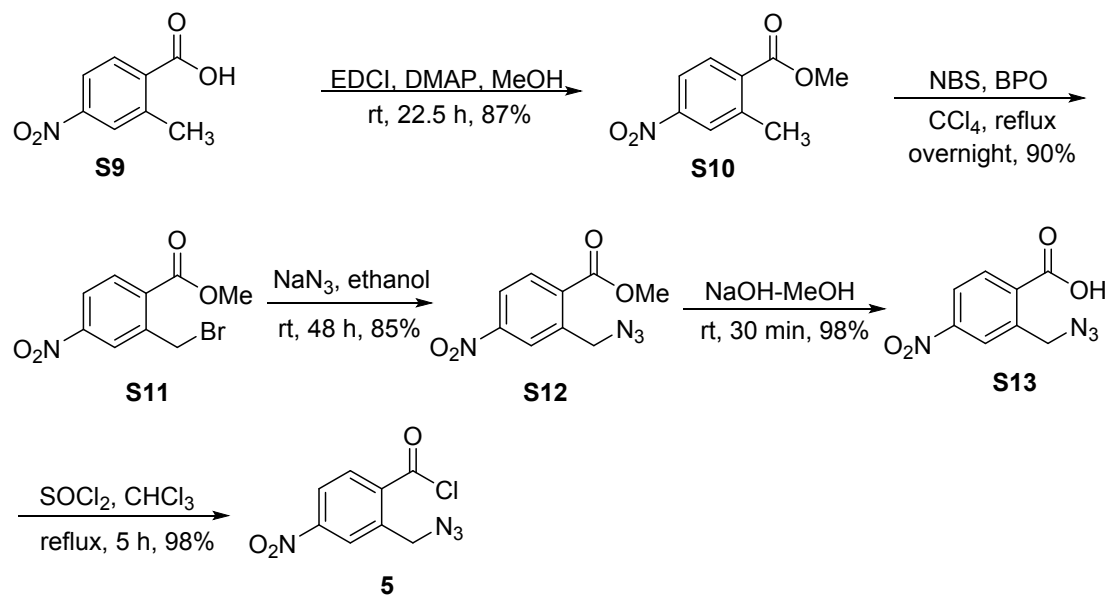

To a solution of **S9** (10.0 g, 55.2 mmol) in MeOH (100 mL), was added EDCl (31.7 g, 165.6 mmol) and DMAP (0.7 g, 5.2 mmol). The resulting solution was stirred for 20 h. The resulting solution was poured into HCl (30 mL, 1 M), and then extracted with DCM (3×100 mL). The combined organic layers were washed with brine, dried over anhydrous MgSO<sub>4</sub> and concentrated to afford **S10** as colorless oil (9.4 g, 87%), which was used for the next step without further purification.

To a solution of **S10** (6.3 g, 32.3 mmol) in CCl<sub>4</sub> (120 mL), was added NBS (6.3 g, 35.5 mmol) and BPO (62.6 mg, 0.3 mmol). The resulting solution was heated to reflux for 2 h. The solution was cooled to room temperature, and then filtered and concentrated. The crude product **S11** was got as colorless oil (8.0 g, 90%), which was used for the next step without further purification.

To a solution of **S11** (8.0 g, 29.1 mmol) in absolute ethanol (50 mL), was added NaN<sub>3</sub> (2.9 g, 43.6 mmol). The resulting solution was warmed to room temperature and stirred for 48 h. The mixture was quenched by addition of brine and extracted with ethyl acetate (3×50 mL). The organic layer was separated, dried over anhydrous MgSO<sub>4</sub>, filtered, and concentrated to yield 5.8 g (85%) of **S12** as light yellow solid, which was used for the next step without further purification.

To a solution of aq NaOH–MeOH (60 mL, aq NaOH, 2 M, 1:1, v:v), was added **S12** (5.8

g, 24.7 mmol). The resulting solution was stirred for 30 min. Then the mixture was extracted with DCM (3×50 mL). The aqueous layer was acidified to pH = 3 and then extracted with DCM (3×50 mL). The combined organic layers were dried over anhydrous MgSO<sub>4</sub>, filtered, and concentrated to yield 4.3 g (98%) of **S13** as a light yellow solid. Data for **S13**: R<sub>f</sub> 0.35 (petroleum ether:ethyl acetate = 1:1); <sup>1</sup>H NMR (400 MHz, CDCl<sub>3</sub>) δ 8.20 (d, *J* = 2.0, 1H), 8.07 (d, *J* = 8.6, 1H), 8.01 (dd, *J* = 8.6, 2.2, 1H), 4.74 (s, 2H); <sup>13</sup>C NMR (100 MHz, CDCl<sub>3</sub>) δ 170.57, 150.72, 141.02, 133.38, 132.25, 124.14, 122.83, 52.65; IR/cm<sup>-1</sup> (thin film) ν<sub>max</sub> 3440, 2928, 2113, 1695, 811, 735; HRMS-ESI (*m/z*) [*M* - H]<sup>-</sup> calcd for C<sub>8</sub>H<sub>5</sub>N<sub>4</sub>O<sub>4</sub><sup>-</sup>, 221.0305, found: 221.0312; mp 112.5–113.9 °C.

To a solution of **S13** (2.0 g, 9.0 mmol) in DCM (30 mL), was added SOCl<sub>2</sub> (3.2 mL, 27.0 mmol) at room temperature. The resulting solution was heated to reflux for 5 h. The mixture was cooled to room temperature and concentrated to yield 2.1 g (98%) of **5** as light yellow oil, which was used for the next step without further purification.

#### Synthesis of probe **ANR**

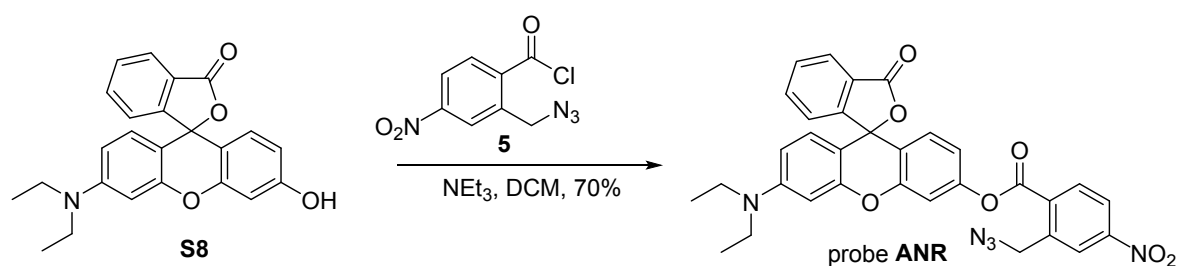

To a suspension of **S8** (1.9 g, 7.7 mmol) and DMAP (1.3 g, 10.3 mmol) in DCM (20 mL) at 0 °C, was added **5** (2.0 g, 5.2 mmol). The resulting mixture was warmed to room temperature and stirred overnight. The resulting mixture was extracted with DCM (3×30 mL). Combined organic layers were washed with brine, dried over anhydrous MgSO<sub>4</sub> and concentrated to afford colorless oil. Flash chromatography of the crude product (4:1 petroleum ether:ethyl acetate) provided the desired product as colorless oil (2.2 g, 70%). Data for **ANR**: R<sub>f</sub> 0.35 (petroleum ether:ethyl acetate = 4:1) <sup>1</sup>H NMR (400 MHz, CDCl<sub>3</sub>) δ 8.45 (dd, *J* = 34.2, 5.4, 1H), 8.34–8.26 (m, 1H), 8.22–8.12 (m, 1H), 8.08–7.97 (m, 1H), 7.77–7.54 (m, 2H), 7.23 (d, *J* = 7.5, 1H), 7.17 (d, *J* = 1.2,

1H), 6.93–6.81 (m, 2H), 6.59 (d,  $J = 8.9$ , 1H), 6.45 (d,  $J = 2.4$ , 1H), 6.38 (dd,  $J = 9.0, 2.5$ , 1H), 4.99 (s, 2H), 3.37 (q,  $J = 7.0$ , 4H), 1.18 (t,  $J = 7.1$ , 6H) ;  $^{13}\text{C}$  NMR (100 MHz,  $\text{CDCl}_3$ )  $\delta$  169.51, 163.18, 152.51, 151.42, 151.15, 150.46, 149.73, 141.00, 134.98, 132.86, 129.46, 128.90, 127.03, 126.49, 125.02, 124.14, 122.87, 120.88, 118.08, 117.79, 116.76, 116.61, 110.20, 108.73, 104.66, 97.51, 83.47, 52.57, 44.52, 12.51. IR/ $\text{cm}^{-1}$ (thin film)  $\nu_{\text{max}}$  3450, 2928, 2113, 1761, 1515, 1419, 1345, 1105, 821, 755; HRMS-ESI ( $m/z$ ) [ $M + H$ ] $^+$  calcd for  $\text{C}_{32}\text{H}_{26}\text{N}_5\text{O}_7^+$ , 592.1827, found: 592.1836.

### 3. In vitro fluorescence spectroscopy measurement

#### General Procedure for $\text{H}_2\text{S}$ Detection

All UV–vis, fluorescence, and quantum yield measurements were carried out in 10 mM PBS buffer solution containing 5%  $\text{CH}_3\text{OH}$ , pH 7.4. In a 5 mL tube, PBS buffer (4 mL) and 250  $\mu\text{L}$  **ANR** (100  $\mu\text{M}$  in  $\text{CH}_3\text{OH}$ ) were mixed, and then 4 mM  $\text{Na}_2\text{S}$  solution (50  $\mu\text{L}$ , 80 eq) was added. The final solution volume was adjusted to 5 mL with PBS buffer to obtain a final concentration of 5  $\mu\text{M}$ . After rapid mixing of the solution, it was placed for 4 min then transferred to a 10  $\times$  10 mm quartz cell and incubated at 37  $^\circ\text{C}$  for in vitro detection. Fluorescence spectra were recorded in the range from 537 to 700 nm with  $\lambda_{\text{ex}} = 519$  nm, and absolute emission quantum yields were determined accordingly.

#### Quantum Yields

Fluorescence quantum yields of **ANR** was determined in PBS buffer (10 mM, pH 7.4) with rhodamine B ( $\Phi = 0.89$ , in ethanol) as a reference. *N,N*-diethylrhodol **3** was obtained in the experiment by addition of 80 eq of  $\text{Na}_2\text{S}$  to the solution of probe **ANR**. The quantum yields were calculated using an Eq follows:

$$\Phi_u = [(A_s FA_u \eta^2) / (A_u FA_s \eta_0^2)] \Phi_s.$$

Where  $A_s$  and  $A_u$  are the absorbance of the reference and sample solution at the reference excitation wavelength,  $FA_s$  and  $FA_u$  are the corresponding integrated fluorescence intensity, and  $\eta$  and  $\eta_0$  are the solvent refractive indexes of sample and

reference, respectively. Absorbance of sample and reference at their respective excitation wavelengths was controlled to be lower than 0.05.

Quantum yield of **ANR**:  $\Phi = 0.0270$

Quantum yield of **3**:  $\Phi = 0.3520$

### Detection limit

To determine the detection limit, the emission intensity of probe **ANR** without Na<sub>2</sub>S was measured by 10 times and the standard deviation of blank measurements was determined. The detection limit was then calculated with the equation: detection limit =  $3\sigma/k$ , where  $\sigma$  was the standard deviation of blank measurements,  $k$  was the slope between intensity difference versus sample concentration. According to fluorometric method, the detection limit of probe **ANR** for H<sub>2</sub>S was determined as 0.4327  $\mu$ M.

$$\text{Detection limit of ANR} = 3\sigma/\text{slope} = 3 * 0.137799 / 0.95526 = 0.4327$$

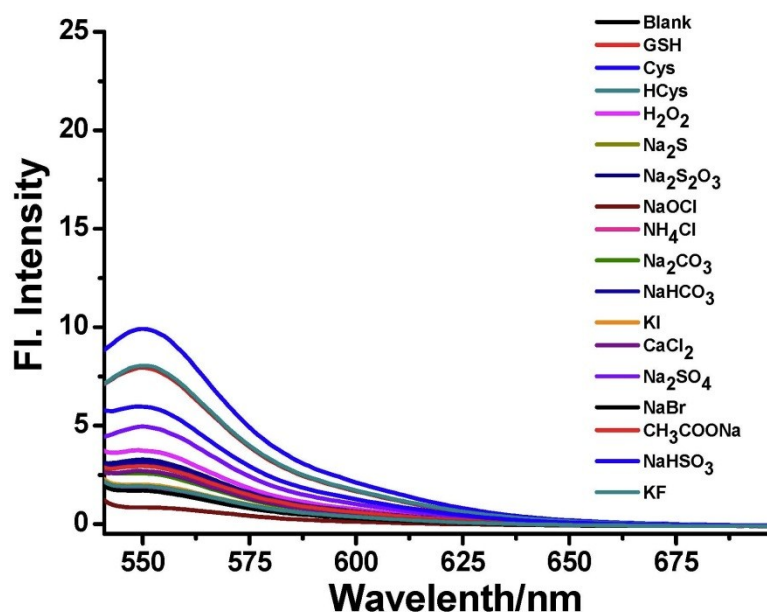

Fig.S1 Fluorescence response of **AR** (5  $\mu$ M) upon addition of various species (80 eq) in CH<sub>3</sub>OH/PBS buffer (10 mM, pH = 7.4, 5:95).  $\lambda_{\text{ex}} = 519$  nm,  $\lambda_{\text{em}} = 550$  nm.



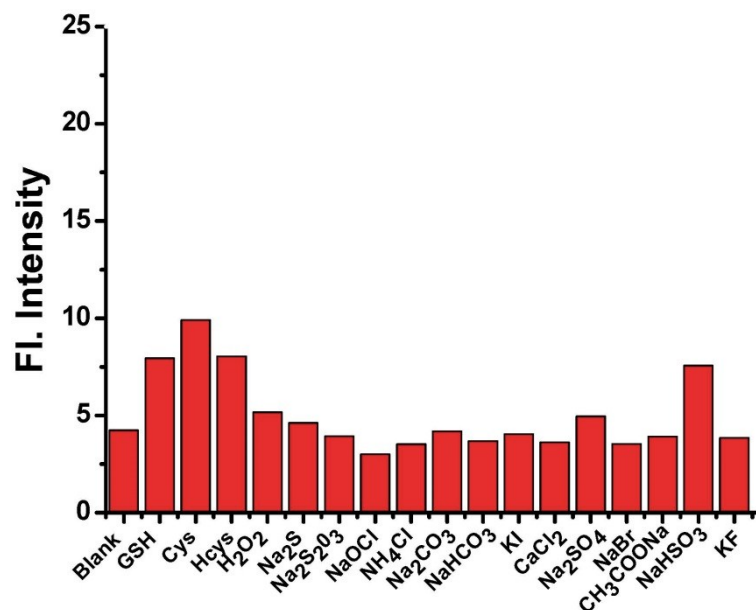

Fig.S2 Bar graph of the fluorescence response of **AR** (5  $\mu$ M) upon addition of various species (80 eq) in CH<sub>3</sub>OH/PBS buffer (10 mM, pH = 7.4, 5:95).  $\lambda_{ex}$  = 519 nm,  $\lambda_{em}$  = 550 nm. Slits: 5/5 nm.

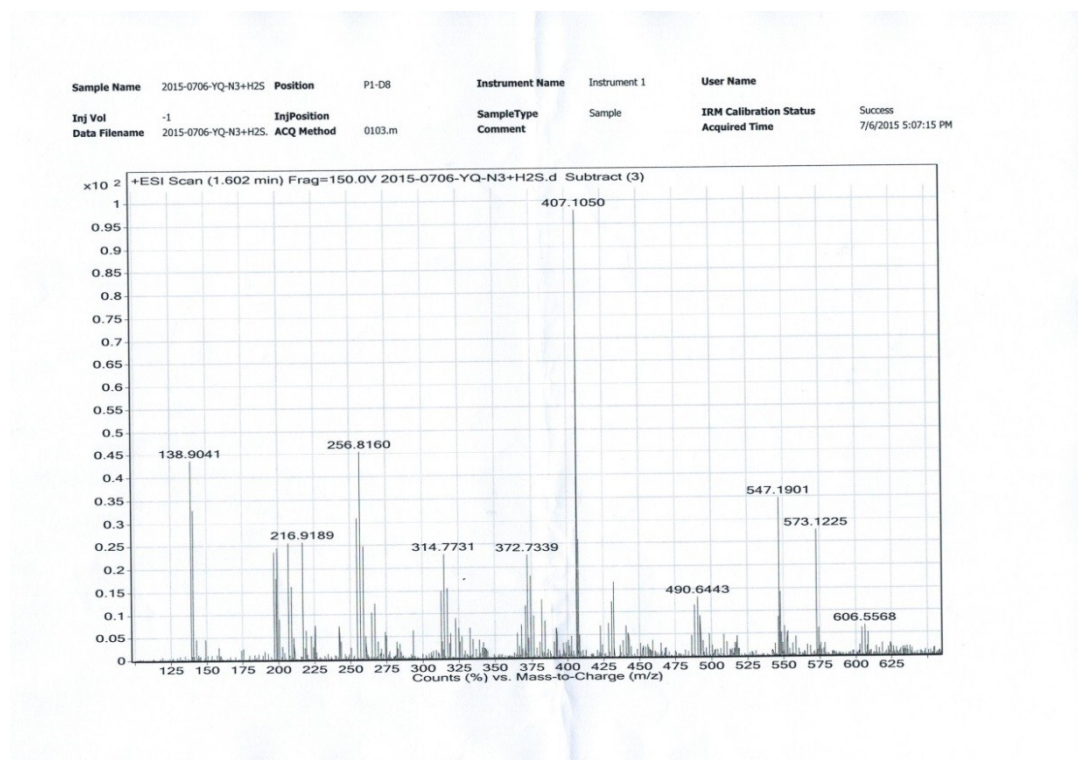

Fig.S3 HRMS chart of **AR** (5  $\mu$ M) treated with Na<sub>2</sub>S (80 eq).

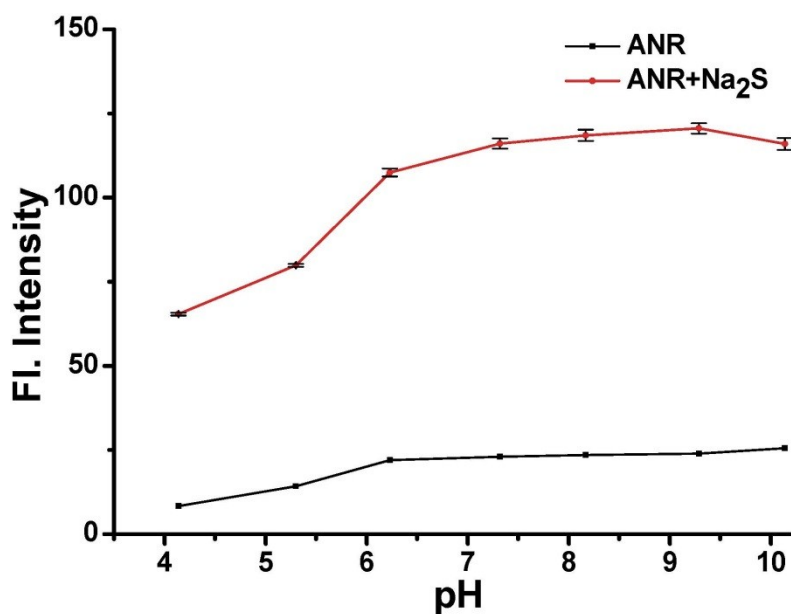

Fig.S4 Fluorescence response of **ANR** (5  $\mu$ M) and **ANR** (5  $\mu$ M) treated with 80 eq of  $\text{Na}_2\text{S}$  in  $\text{CH}_3\text{OH}/\text{PBS}$  buffer (10 mM, 5:95, pH from 4 to 8).  $\lambda_{\text{ex}} = 519 \text{ nm}$ ,  $\lambda_{\text{em}} = 550 \text{ nm}$ . Slits: 5/5 nm.

| Sample Name   | 2015-0917-YANG-5   | Position    | P1-C7  | Instrument Name | Instrument 1 | User Name              |                      |
|---------------|--------------------|-------------|--------|-----------------|--------------|------------------------|----------------------|
| Inj Vol       | -1                 | InjPosition |        | SampleType      | Sample       | IRM Calibration Status | Success              |
| Data Filename | 2015-0917-YANG-5.d | ACQ Method  | 0103.m | Comment         |              | Acquired Time          | 9/17/2015 3:58:31 PM |

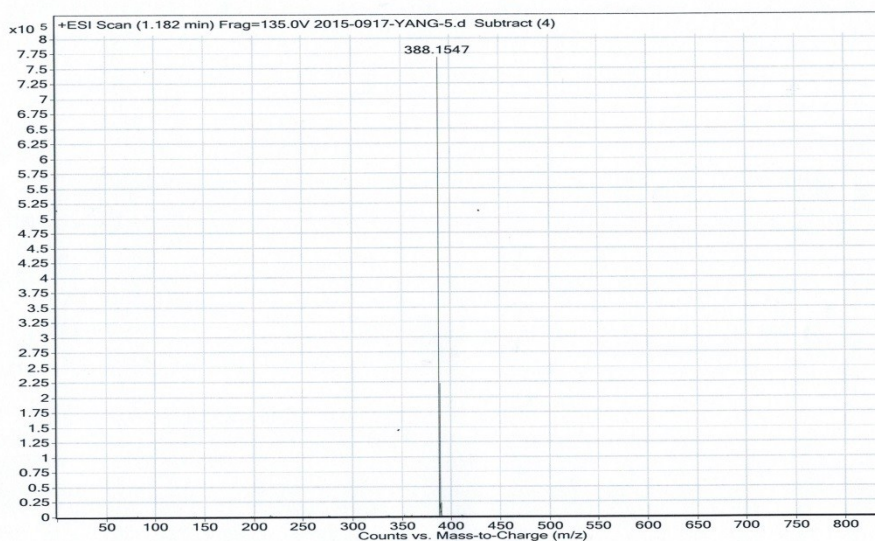

Fig.S5 HRMS chart of **ANR** treated with  $\text{Na}_2\text{S}$  (80 eq).

#### 4. MTT assay

The MTT assay was used to evaluate the cytotoxicity of probe. MCF-7 cells and 3T3 cells were cultured in DMEM medium supplemented with 10% fetal bovine serum at 37 °C in an atmosphere containing 5%  $\text{CO}_2$ . MCF-7 cells and 3T3 cells were

seeded onto 96-well plates at a density of  $1 \times 10^4$  cells/well and incubated for 24 h. The medium was replaced by various probe over a range of concentrations (0.5  $\mu\text{M}$  to 30  $\mu\text{M}$ ) dissolved in culture medium. After incubation at 37 °C, 5%  $\text{CO}_2$  for 24 h, each well of cells were treated with 20  $\mu\text{l}$  MTT solution (5 mg/mL), and incubated for another 4 h. After that, the medium was removed, and 100  $\mu\text{L}$  of DMSO were added to dissolve the formazan crystals. The plate was agitated for 10 min, and each well was finally analyzed by the microplate reader (Thermo Scientific, Multiskan FC) and detected by the absorbance at 570 nm.

MCF-7:  $\text{IC}_{50}$  69.6  $\mu\text{M}$ .

3T3:  $\text{IC}_{50}$  91.5  $\mu\text{M}$ .

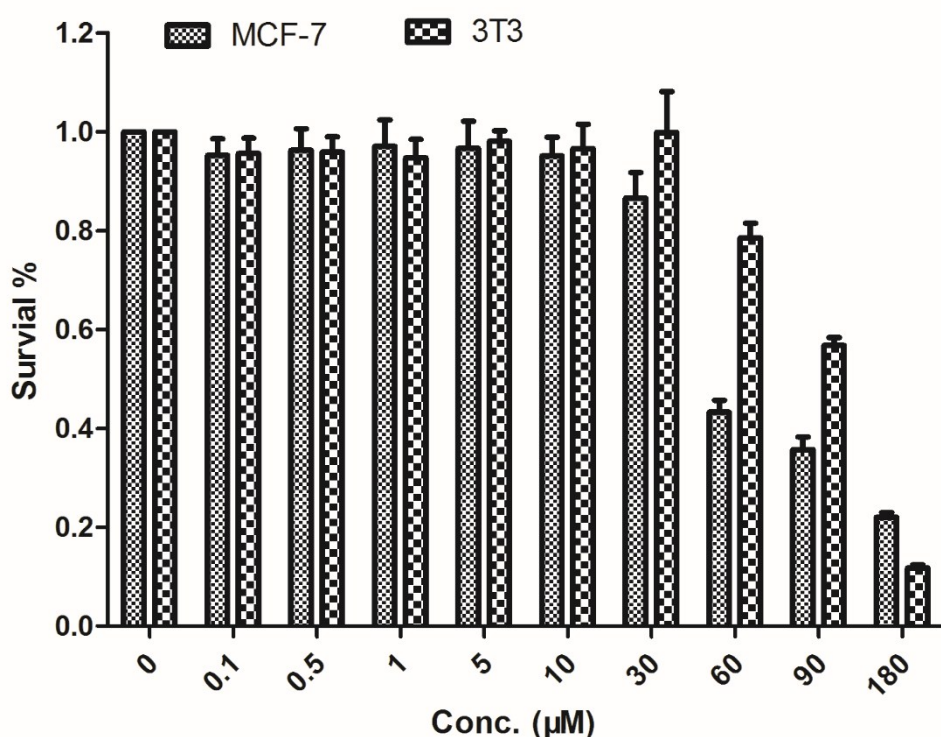

Fig.S6 The cytotoxicity of the probe **ANR** evaluated by the MTT assay

## 5. Cell culture and fluorescence imaging

The mammalian cells MCF-7 were cultured in DMEM medium supplemented with 10% fetal bovine serum at 37 °C in an atmosphere containing 5%  $\text{CO}_2$ . For live cell imaging, probe **ANR** was added to the cells and incubated for 30 min and washed with PBS (phosphate-buffered saline) three times. After replacement of the

medium, cells were imaged using an Olympus (FV1000) confocal laser scanning microscope with a 200×objective lens.

## 6. R references

1. J. Huang; Z. Xi, *Tetrahedron Lett.*, 2012, **53**, 3654.
2. W. Dong; H. Wen; X. -F. Yang; H. Li, *Dyes Pigments*, 2013, **96**, 653.

## 7. <sup>1</sup>H NMR, <sup>13</sup>C NMR chart of compounds AR and ANR

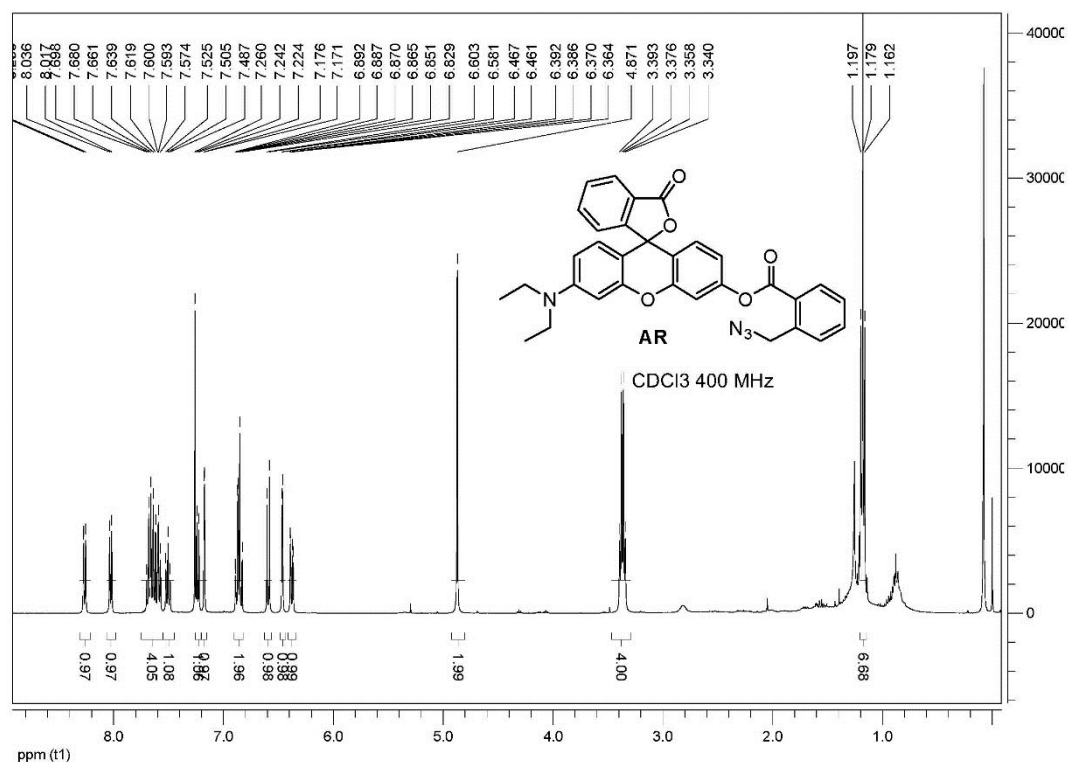

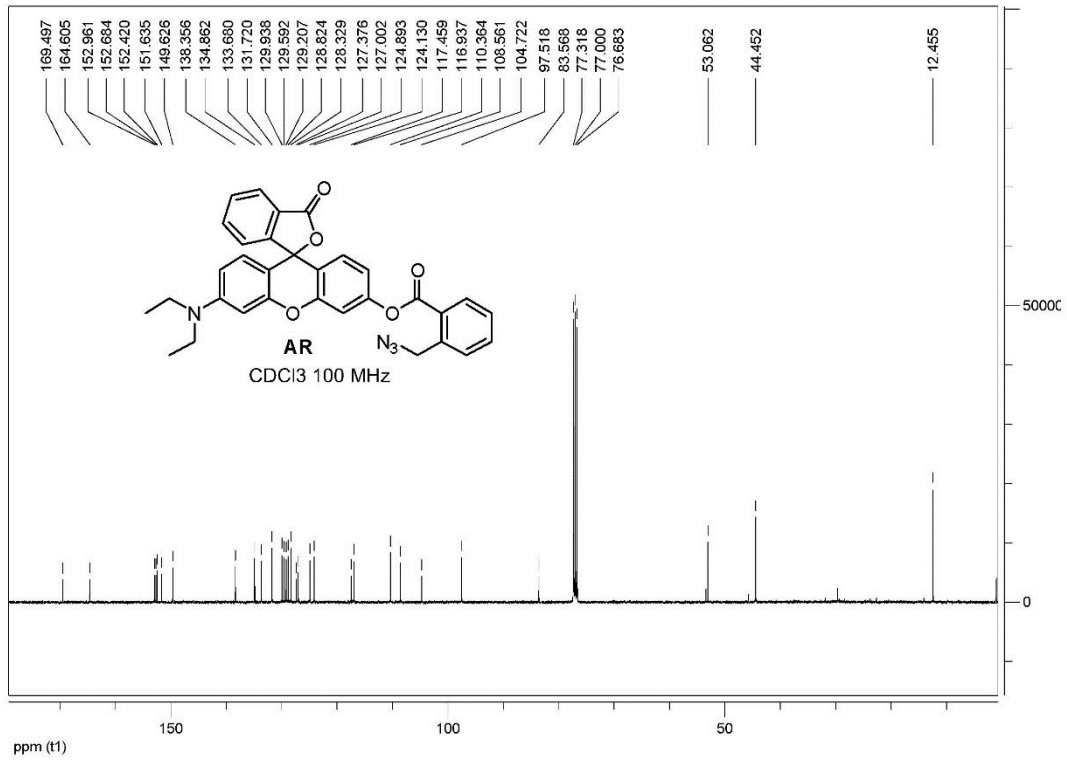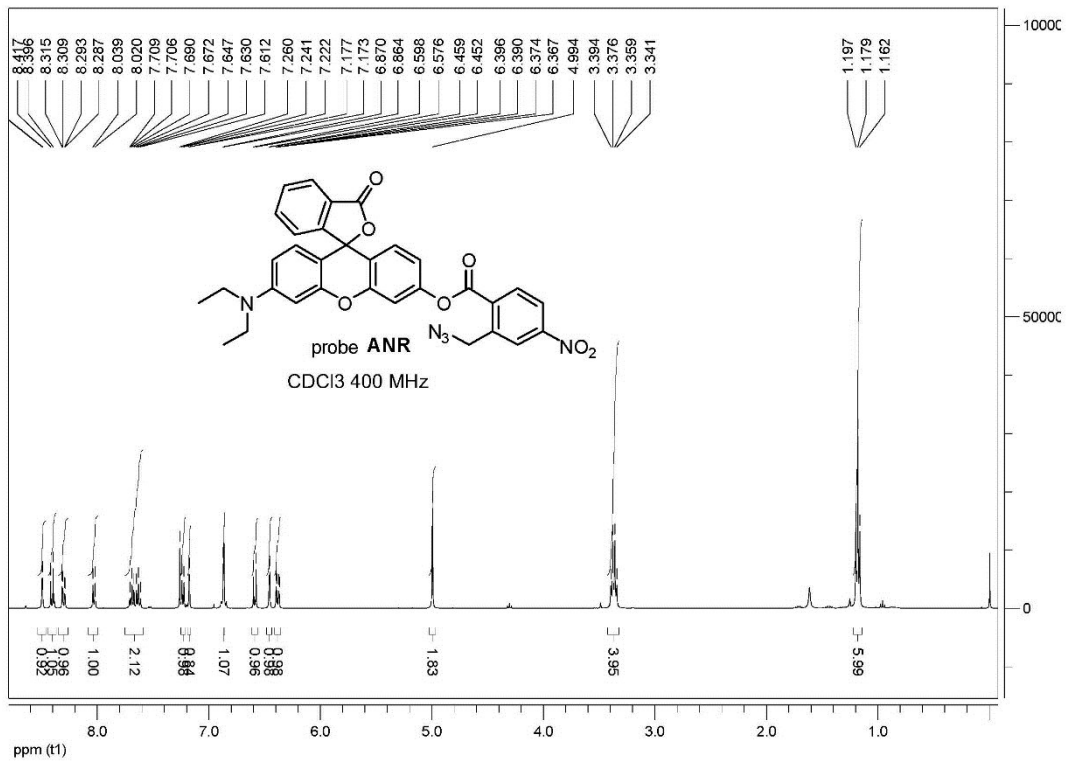

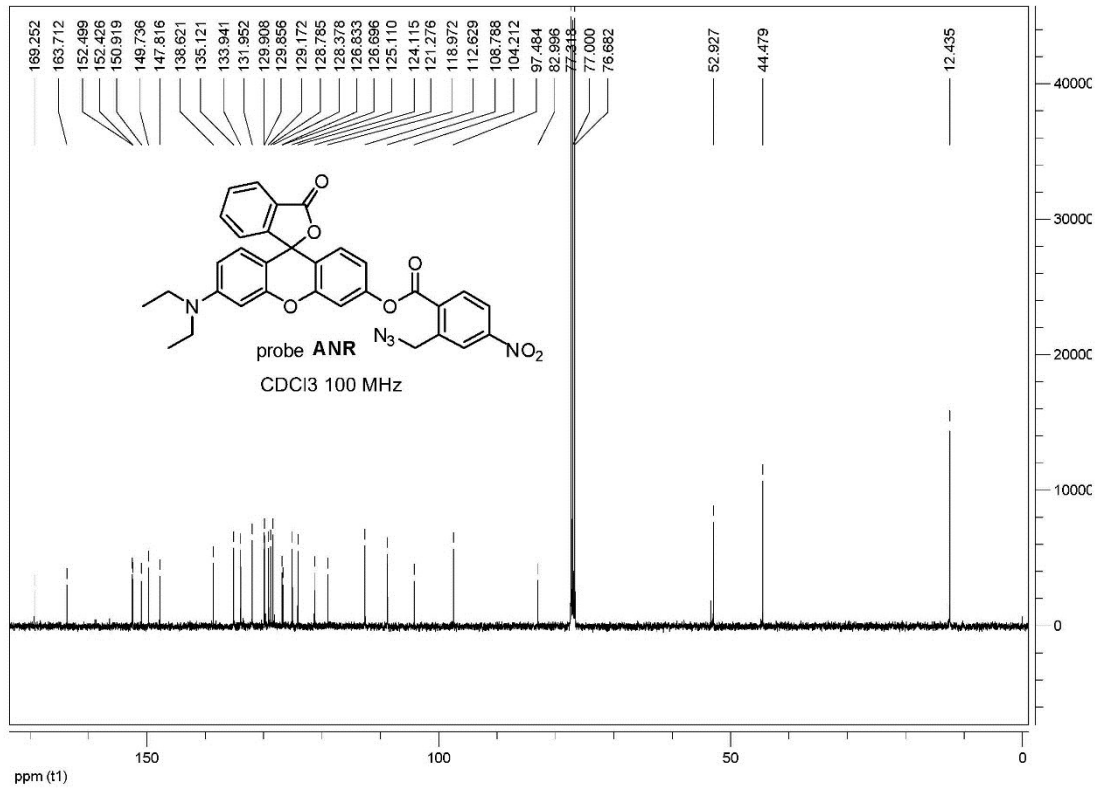

Supplement: c5ra21041k1.pdf [file c5ra21041k1.pdf]
